# Supplementary material
Source: PubMed Central journal article supplement (PMC3064234)
Supplement: supp_M110.194969_jbc.M110.194969-1.pdf [file supp_M110.194969_jbc.M110.194969-1.pdf]

## SUPPLEMENTAL FIGURE LEGENDS

FIGURE S1. **Differential expression of *miR-29c* in control *db/m* vs. diabetic *db/db* mice.** Northern blot analysis shows representative results of *miR-29c* expression in several tissues from control *db/m* and diabetic *db/db* mice. U6 snRNA serves as the loading control.

FIGURE S2. **Upregulation of *miR-29c* expression in streptozotocin (STZ)-induced mouse model of DN.** Northern blot analysis shows representative results from kidney *miR-29c* expression in controls and STZ-induced diabetic mice (n=3). U6 snRNA serves as a loading control.

FIGURE S3. **Upregulation of *miR-29c* expression in kidney microvascular endothelial cells.** Real-time qPCR analysis shows *miR-29c* expression in high-glucose (HG)-treated (24 hrs) cultured kidney microvascular endothelial cells as compared to normal glucose (NG) conditions. Measured transcript levels were normalized to U6 snRNA expression. Samples were run in triplicate. Data are shown as mean±SE.

FIGURE S4. **Downregulation of *Spry1* expression by *miR-29c* overexpression.** Lenti-CAG and Lenti-*miR-29c*-infected podocytes were treated with normal glucose (NG) or high glucose (HG) for 36 hrs. *Spry1* expression in total cell lysates was analyzed by Western blot. GAPDH serves as a loading control.

FIGURE S5. **Effect of *miR-29c* on podocyte apoptosis.** Apoptotic cells were labeled with annexin V-FITC and Sytox Red and analyzed by FACS. Representative data are shown from three independent experiments. The percentages of early apoptotic cells (annexin-positive and Sytox-negative) are shown which are also presented as graphs in Figures 5A and 5C. *A*, Lenti-CAG and Lenti-*miR-29c* podocytes were transfected with *miR-29c* inhibitor. *B*, Control podocytes were transfected with *Spry1* siRNA (si*Spry1*, 30 nM) and/or *miR-29c* inhibitor as indicated, and treated with HG (25mM) for 36hrs.

FIGURE S6. **Knockdown of *Spry1* expression by *Spry1* siRNA.** Cultured podocytes were transfected with *Spry1* siRNA by Lipofectamine 2000. Knockdown efficiency of *Spry1* at the protein level was verified by Western blot. GAPDH serves as the loading control.

FIGURE S7. **Knockdown of *miR-29c* in different tissues of *db/db* mice with *miR-29c* antisense oligonucleotides (*miR-29c* ASO).** Real-time qPCR analysis shows *miR-29c* expression in the indicated tissues following treatment with *miR-29c* ASO. NS: non significant.

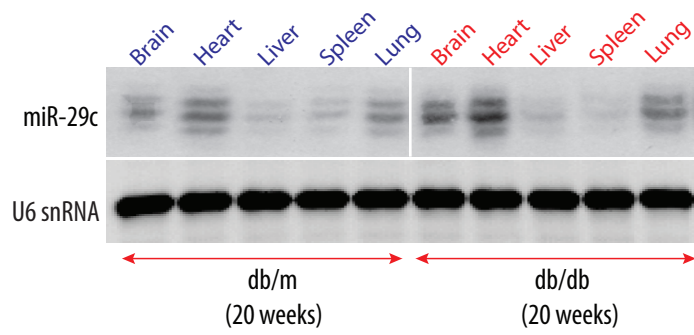

Supplemental Figure-1

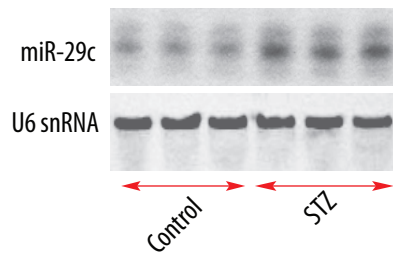

Supplemental Figure-2

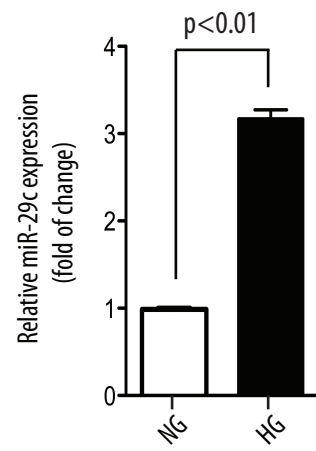

Supplemental Figure-3

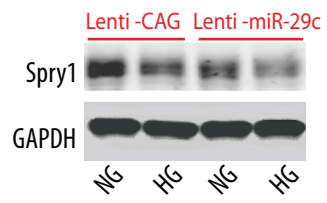

Supplemental Figure-4

**A**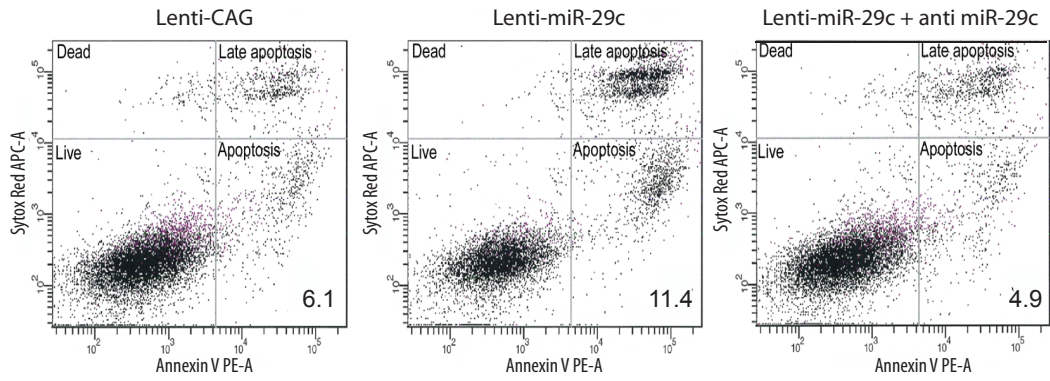**B**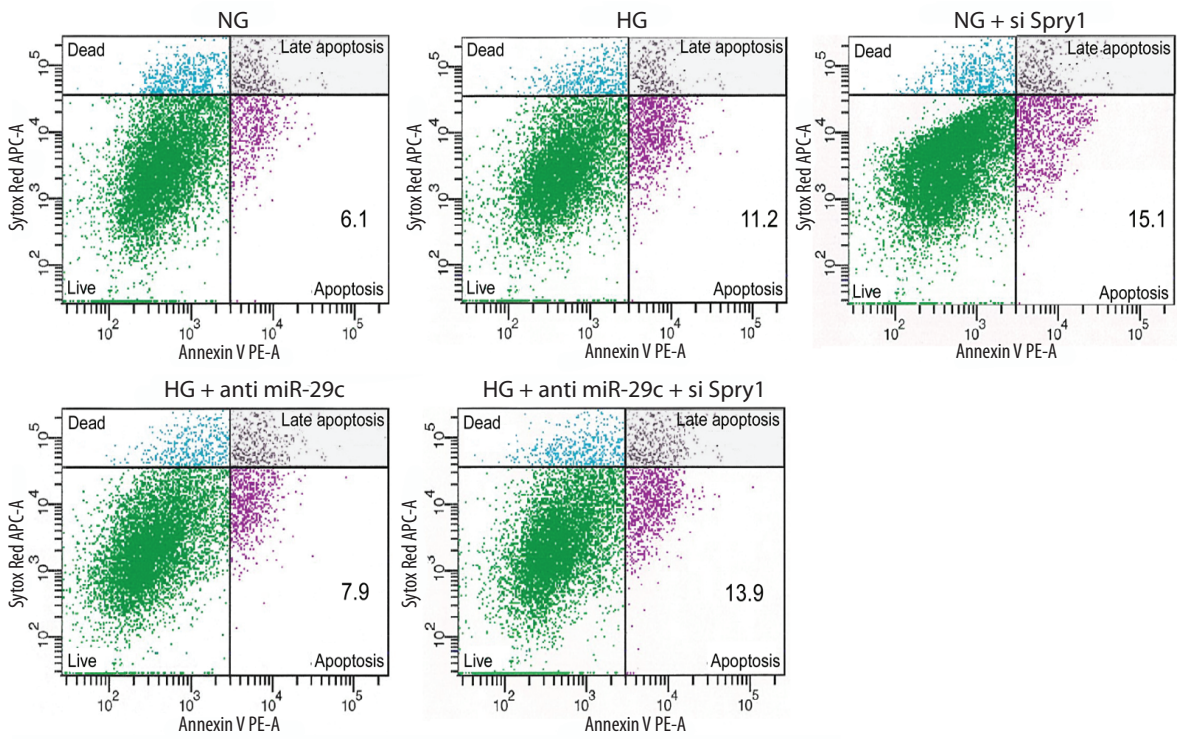

Supplemental Figure-5

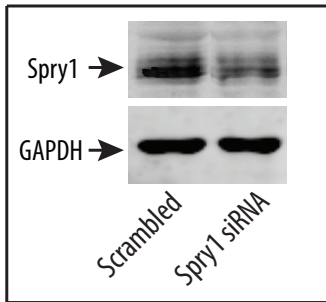

Supplemental Figure-6

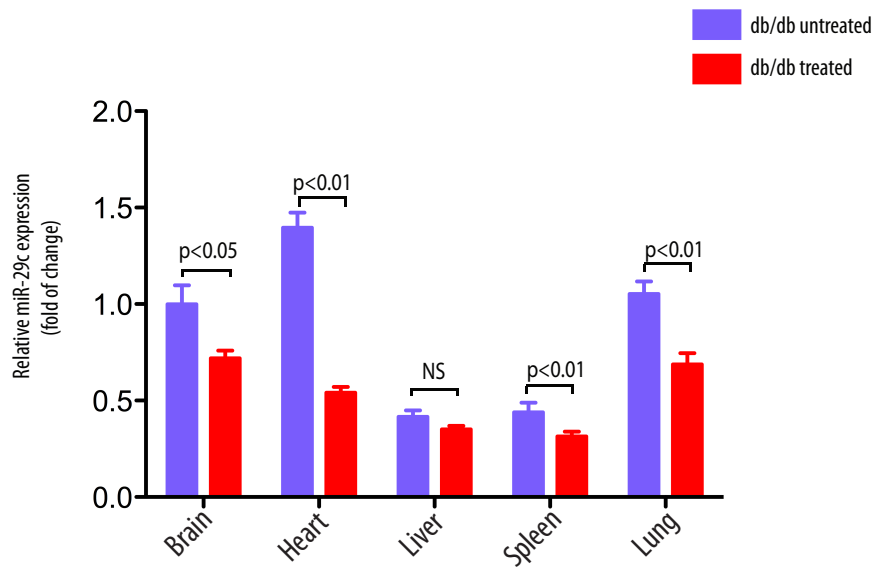

Supplemental Figure-7



| miRNA ID     | mouse kidney microvascular endothelial cells |           |            |            | mouse cultured podocytes |           |            |            |
|--------------|----------------------------------------------|-----------|------------|------------|--------------------------|-----------|------------|------------|
|              | NG                                           | HG (6hrs) | HG (12hrs) | HG (24hrs) | NG                       | HG (6hrs) | HG (12hrs) | HG (24hrs) |
| mmu-miR-192  | 90                                           | 112       | 123        | 190        | 133                      | 217       | 120        | 492        |
| mmu-miR-29c  | 67                                           | 185       | 1,092      | 693        | 292                      | 369       | 421        | 417        |
| mmu-miR-26b  | 1,132                                        | 1,113     | 1,633      | 1,914      | 4,826                    | 5,116     | 6,849      | 8,336      |
| mmu-miR-1196 | 162                                          | 244       | 223        | 411        | 282                      | 485       | 540        | 793        |
| mmu-miR-1195 | 286                                          | 328       | 811        | 741        | 580                      | 842       | 805        | 750        |
| mmu-miR-200b | 95                                           | 158       | 280        | 503        | 1,871                    | 2,698     | 4,367      | 3,756      |
| mmu-let-7g   | 2,162                                        | 2,213     | 3,299      | 3,269      | 935                      | 1,090     | 1,797      | 2,071      |
| mmu-miR-200a | 212                                          | 121       | 450        | 547        | 322                      | 807       | 1,057      | 990        |
| mmu-miR-705  | 243                                          | 160       | 342        | 336        | 11,928                   | 7,127     | 16,002     | 20,979     |

Supplementary TABLE 1. **Temporal expression profiles of differentially expressed miRNAs in high glucose-treated kidney microvascular endothelial cells and cultured podocytes.** The relative expression of the upregulated miRNAs at indicated time points are shown. All data are expressed as the mean signal intensity. NG: normal glucose; HG: high glucose.
